# Supplementary material
Source: publisher site journal article supplement (https://cdn.jamanetwork.com/ama/content_public/journal/otol/938880/ooi210079supp1_prod_1646672281.35717.pdf)
Supplement: Supplementary file 1 [file ooi210079supp1_prod_1646672281.35717.pdf]

## Supplemental Online Content

Gupta S, Kallogjeri D, Farrell NF, et al. Development and validation of a novel at-home smell assessment. *JAMA Otolaryngol Head Neck Surg*. Published online January 13, 2022.  
doi:10.1001/jamaoto.2021.3994

**eTable.** Performance of 45 Items on Household Survey

**eFigure 1.** Clusters of 174 Smell Descriptors

**eFigure 2.** 45-Item Household Survey Experience

**eFigure 3.** Boxplots of the CGI-S Response Categories with Total NASAL-7 and NASAL-3 Scores

This supplemental material has been provided by the authors to give readers additional information about their work.

**eTable.** Performance of 45 Items on Household Survey

| Cluster | Item                                       | Availability<br>of item (%) | Comparison to <i>UPSIT</i> |                          |            | Comparison to <i>CGI-S</i> |                          |            |
|---------|--------------------------------------------|-----------------------------|----------------------------|--------------------------|------------|----------------------------|--------------------------|------------|
|         |                                            |                             | Sensitivity <sup>a</sup>   | Specificity <sup>a</sup> | Youden's J | Sensitivity <sup>b</sup>   | Specificity <sup>b</sup> | Youden's J |
| 4       | soap                                       | 99%                         | 0.67                       | 0.93                     | 0.60       | 0.86                       | 0.92                     | 0.77       |
| 2       | disinfectant                               | 98%                         | 0.71                       | 0.76                     | 0.48       | 0.86                       | 0.86                     | 0.72       |
| 7       | fresh butter                               | 97%                         | 0.89                       | 0.29                     | 0.18       | 0.94                       | 0.36                     | 0.30       |
| 8       | vinegar                                    | 97%                         | 0.62                       | 0.93                     | 0.55       | 0.73                       | 0.95                     | 0.68       |
| 6       | black pepper                               | 97%                         | 0.75                       | 0.88                     | 0.63       | 0.69                       | 0.82                     | 0.50       |
| 7       | peanut butter                              | 97%                         | 0.68                       | 0.90                     | 0.59       | 0.83                       | 0.86                     | 0.69       |
| 3       | cheese                                     | 96%                         | 0.81                       | 0.68                     | 0.50       | 0.80                       | 0.65                     | 0.45       |
| 6       | herb (eg. rosemary,<br>thyme, basil)       | 95%                         | 0.67                       | 0.93                     | 0.60       | 0.71                       | 0.91                     | 0.62       |
| 7       | cinnamon                                   | 95%                         | 0.77                       | 0.87                     | 0.64       | 0.57                       | 0.86                     | 0.44       |
| 7       | burnt candle                               | 95%                         | 0.82                       | 0.85                     | 0.66       | 0.86                       | 0.80                     | 0.66       |
| 8       | garlic                                     | 95%                         | 0.67                       | 0.91                     | 0.58       | 0.77                       | 0.89                     | 0.66       |
| 7       | vanilla                                    | 94%                         | 0.73                       | 0.70                     | 0.43       | 0.85                       | 0.83                     | 0.68       |
| 7       | spice (eg. tarragon,<br>turmeric, paprika) | 93%                         | 0.76                       | 0.83                     | 0.60       | 0.73                       | 0.78                     | 0.52       |
| 3       | peppermint (or other<br>mint, menthol)     | 92%                         | 0.64                       | 0.95                     | 0.60       | 0.64                       | 0.92                     | 0.56       |
| 7       | maple syrup                                | 92%                         | 0.92                       | 0.75                     | 0.67       | 0.62                       | 0.76                     | 0.38       |
| 8       | seasoning (for meat)                       | 92%                         | 0.85                       | 0.94                     | 0.78       | 0.79                       | 0.86                     | 0.64       |
| 8       | onion                                      | 91%                         | 0.64                       | 0.89                     | 0.54       | 0.69                       | 0.84                     | 0.53       |
| 1       | fruit/citrus additive                      | 90%                         | 0.75                       | 0.92                     | 0.67       | 0.82                       | 0.86                     | 0.68       |
| 7       | honey                                      | 90%                         | 0.92                       | 0.61                     | 0.53       | 0.92                       | 0.66                     | 0.57       |
| 7       | chocolate                                  | 90%                         | 0.86                       | 0.65                     | 0.50       | 0.83                       | 0.72                     | 0.56       |
| 1       | lemon                                      | 88%                         | 0.77                       | 0.80                     | 0.57       | 0.77                       | 0.84                     | 0.61       |
| 2       | rubbing alcohol                            | 88%                         | 0.64                       | 0.90                     | 0.54       | 0.77                       | 0.89                     | 0.66       |
| 3       | tea leaves                                 | 88%                         | 0.80                       | 0.75                     | 0.55       | 0.69                       | 0.77                     | 0.46       |
| 7       | coffee                                     | 88%                         | 0.67                       | 0.94                     | 0.61       | 0.78                       | 0.91                     | 0.69       |
| 6       | fresh green vegetables                     | 85%                         | 0.92                       | 0.35                     | 0.27       | 1.00                       | 0.47                     | 0.47       |
| 7       | melted butter/buttery<br>popcorn           | 85%                         | 0.67                       | 0.77                     | 0.44       | 0.93                       | 0.79                     | 0.73       |
| 4       | perfume                                    | 83%                         | 0.62                       | 0.92                     | 0.54       | 0.92                       | 0.94                     | 0.85       |
| 2       | nail polish remover                        | 82%                         | 0.47                       | 0.89                     | 0.36       | 0.91                       | 0.96                     | 0.86       |

|   |                            |     |      |      |       |      |      |      |
|---|----------------------------|-----|------|------|-------|------|------|------|
| 5 | banana                     | 80% | 0.77 | 0.76 | 0.53  | 0.92 | 0.80 | 0.72 |
| 2 | gasoline                   | 76% | 0.62 | 0.87 | 0.48  | 0.89 | 0.88 | 0.76 |
| 8 | apple (fruit)              | 75% | 0.85 | 0.83 | 0.68  | 0.92 | 0.72 | 0.64 |
| 6 | raw potato                 | 73% | 0.84 | 0.43 | 0.27  | 1.00 | 0.50 | 0.50 |
| 1 | orange                     | 72% | 0.64 | 0.83 | 0.48  | 0.82 | 0.88 | 0.70 |
| 8 | raw meat                   | 71% | 0.77 | 0.38 | 0.15  | 0.92 | 0.54 | 0.46 |
| 3 | caraway (or fennel, cumin) | 66% | 0.82 | 0.86 | 0.68  | 0.70 | 0.82 | 0.52 |
| 4 | cologne                    | 65% | 0.56 | 0.82 | 0.37  | 0.82 | 0.91 | 0.73 |
| 6 | green pepper               | 64% | 0.73 | 0.63 | 0.35  | 0.75 | 0.62 | 0.37 |
| 4 | flowers                    | 61% | 0.83 | 0.14 | -0.02 | 1.00 | 0.60 | 0.60 |
| 7 | clove                      | 58% | 0.63 | 0.93 | 0.56  | 0.86 | 0.94 | 0.80 |
| 5 | strawberry                 | 55% | 0.75 | 0.69 | 0.44  | 0.70 | 0.75 | 0.45 |
| 2 | paint                      | 53% | 0.64 | 0.70 | 0.34  | 0.78 | 0.80 | 0.58 |
| 8 | wet dog                    | 46% | 0.88 | 0.63 | 0.50  | 1.00 | 0.61 | 0.61 |
| 6 | cut/crushed grass          | 43% | 0.86 | 0.50 | 0.36  | 1.00 | 0.68 | 0.68 |
| 6 | baby powder                | 41% | 0.80 | 0.75 | 0.55  | 1.00 | 0.76 | 0.76 |
| 5 | peach (fruit)              | 27% | 0.75 | 0.60 | 0.35  | 0.75 | 0.67 | 0.42 |

*UPSIT* = University of Pennsylvania Smell Identification Test, *CGI-S* = Clinical Global Impression-Severity scale on current ability to smell, <sup>a</sup> Calculated by comparing participants with anosmia or normosmia on the *UPSIT* to participants who could not smell the item at all or smelled it normally on Household Survey, <sup>b</sup> Calculated by comparing participants who reported an absent sense of smell or not on the *CGI-S* to participants who could not smell the item or smelled it normally/less strong than normally on Household Survey

The items are ranked in terms of availability. Sensitivity, specificity, and Youden's J were calculated for each item in comparison to the *UPSIT* and the *CGI-S*. Items with less than 88% availability were excluded from consideration (gray). Face and content validity were used to exclude 10 more items (blue), leaving the final list of 14 used to develop *NASAL*.

**eFigure 1. Clusters of 174 Smell Descriptors**

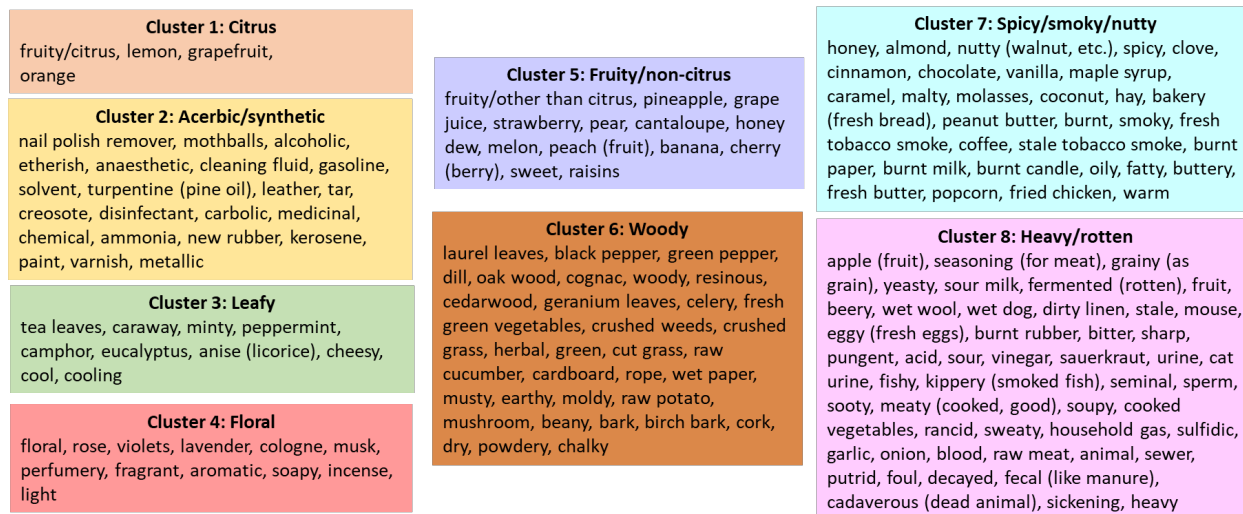

These eight clusters of smell descriptors were adapted from classification of a monomolecular odorant database derived from non-negative matrix factorization.

1. Castro JB, Ramanathan A, Chennubhotla CS. Categorical Dimensions of Human Odor Descriptor Space Revealed by Non-Negative Matrix Factorization. PLOS ONE. 2013;8(9):e73289.
2. Patnaik B, Batch A, Elmqvist N. Information Olfaction: Harnessing Scent to Convey Data. IEEE Transactions on Visualization and Computer Graphics. 2018;PP:1-1.

**eFigure 2.** 45-Item Household Survey Experience

**Kitchen Items**

**Vanity/Bathroom Items**

**Garage/Outdoor Items**

**Lemon**

Cut a lemon in half or take a peeler and zest it. Smell the lemon.

Smells like normal

Smells less strong than normal

Smells different from normal

Cannot smell

Do not have access to this item

Back | Next

A household items survey was developed with 45 items, each with specific instructions on how to smell the item and with a standardized 5-option response. Items were separated by location: kitchen, vanity/bathroom, or garage/outdoor. Performance of each item was used to determine its usefulness in an at-home diagnostic tool for olfactory dysfunction.

**eFigure 3.** Boxplots of the CGI-S Response Categories with Total NASAL-7 and NASAL-3 Scores

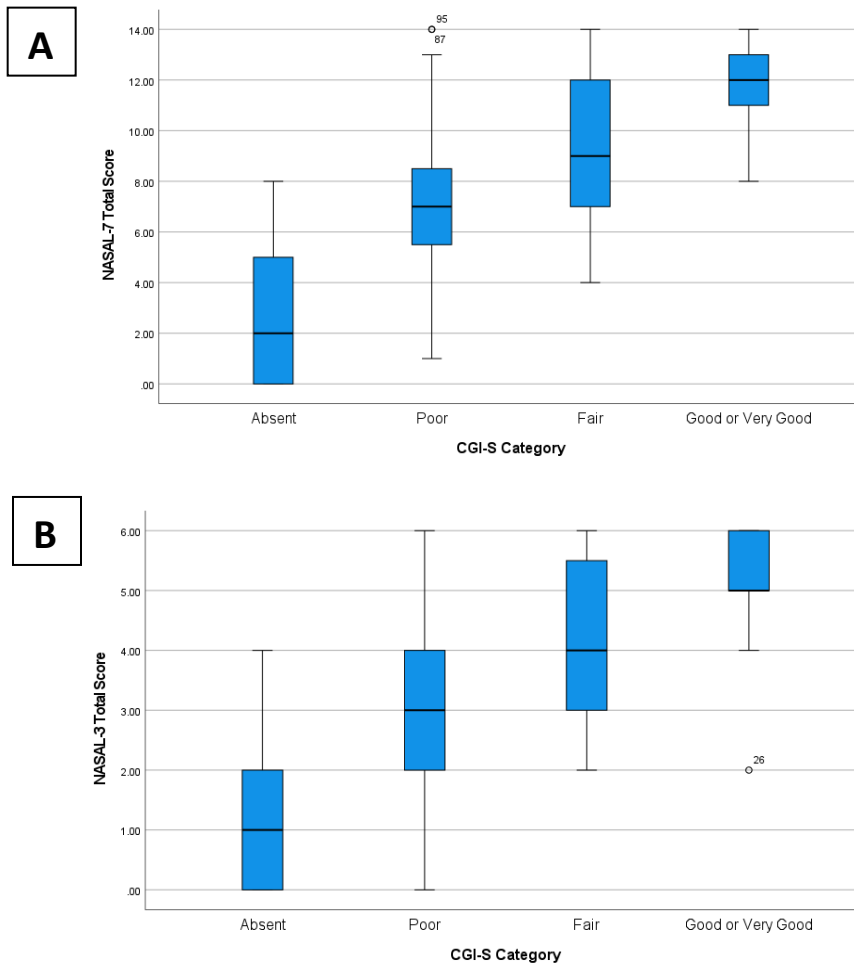

The distribution of participant scores forms a natural gradient that helped to form the scaling system for each *NASAL* instrument.
